# Supplementary material for: Sources and sinks driving sulphuric acid concentrations in contrasting environments: implications on proxy calculations
Source: Copernicus journal article supplement (doi:10.5194/acp-2020-155), 2020-03-10
Supplement: Supplementary file 1 [file acp-2020-155-supplement.pdf]

1 **Supplementary Material** for

2

3 **Sources and sinks driving sulphuric acid concentrations in contrasting environments:**  
 4 **implications on proxy calculations**

5 by Lubna Dada *et al.*

6

7 *Table S 1 Summary of measurement locations and instrumentation used.*

| Location            | Type             | Measurement Period                                                       | Particle size distribution instrument                | Trace Gases                                                                                                                      | Radiation                                                                                                                                                                                                                   |
|---------------------|------------------|--------------------------------------------------------------------------|------------------------------------------------------|----------------------------------------------------------------------------------------------------------------------------------|-----------------------------------------------------------------------------------------------------------------------------------------------------------------------------------------------------------------------------|
| Hyytiälä, Finland   | Boreal           | August 18, 2016 to April 16, 2017 and March 8, 2018 to February 28, 2019 | Twin - DMPS                                          | SO <sub>2</sub> and O <sub>3</sub> are monitored using two Thermo Environmental Instruments (models 43i-TLE, 49i, respectively). | UVB radiation was measured with Solar SL 501A pyranometer (280 - 320 nm). Global radiation was measured with Middleton solar SK08 pyranometer until August 24, 2017 and after that with Middleton solar EQ08-S pyranometer. |
| Agia Marina, Cyprus | Rural background | February 22 and March 3, 2018                                            | 2-20 nm using Airl NAIS and 20-800 nm using TSI SMPS | SO <sub>2</sub> and O <sub>3</sub> are monitored using Ecotech Instruments (9850 and 9810, respectively)                         | Campbell Scientific weather station                                                                                                                                                                                         |
| Budapest, Hungary   | Urban            | March 21 and May 1, 2018                                                 | 6-1000 nm using TSI SMPS                             | UV fluorescence (Ysselbach 43C)                                                                                                  | Global radiation was measured by an SMP3 pyranometer (Kipp and Zonnen, The Netherlands)                                                                                                                                     |
| Beijing, China      | MegaCity         | December 1, 2018 – January 31, 2019                                      | 3 – 800 nm PSD system                                | SO <sub>2</sub> and O <sub>3</sub> are monitored using two Thermo Environmental Instruments (models 43i-TLE, 49i, respectively). | The UVB (280–315 nm) radiation intensity was measured at the rooftop of the 5-floor building (UV-SB-T, KIPP&ZONEN, Netherlands)                                                                                             |

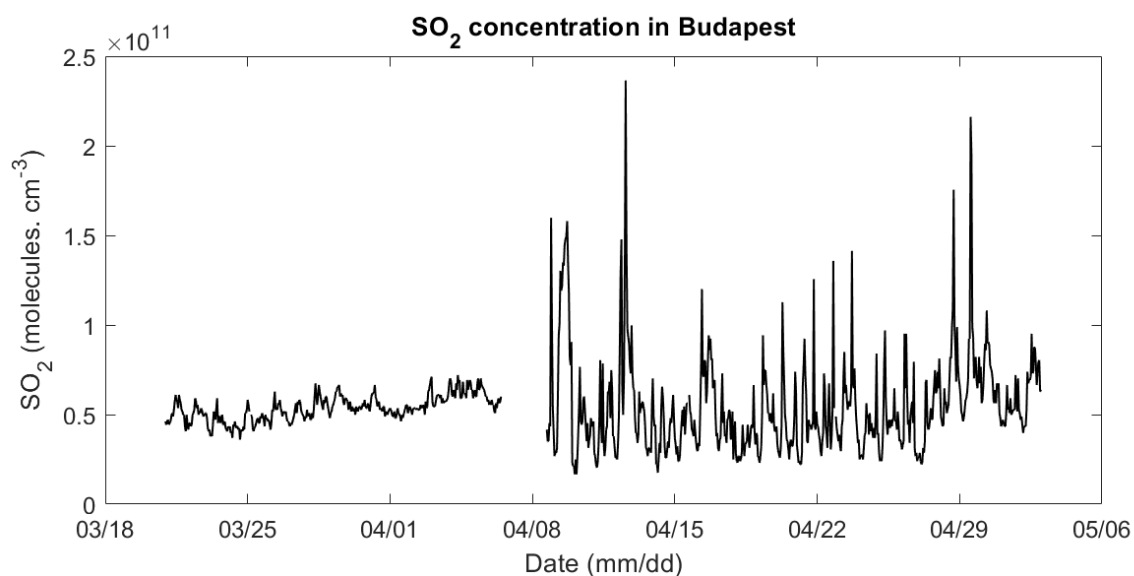

8  
9  
10  
11

Figure S 1 SO<sub>2</sub> concentration in Budapest showing the change in concentration due to changes in meteorology mid-campaign.

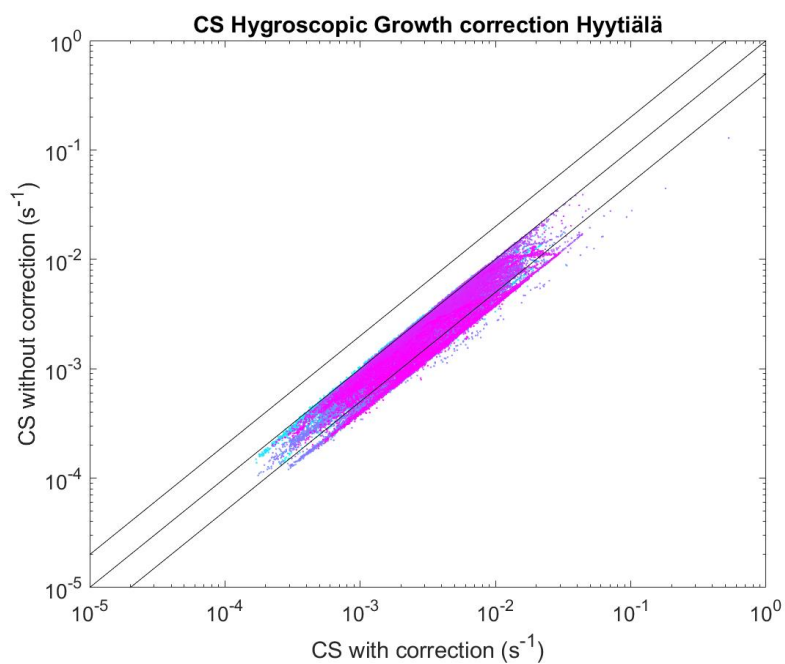

12  
13  
14  
15  
16

Figure S 2 Effect of hygroscopic growth correction on condensation sink calculation in the boreal forest.

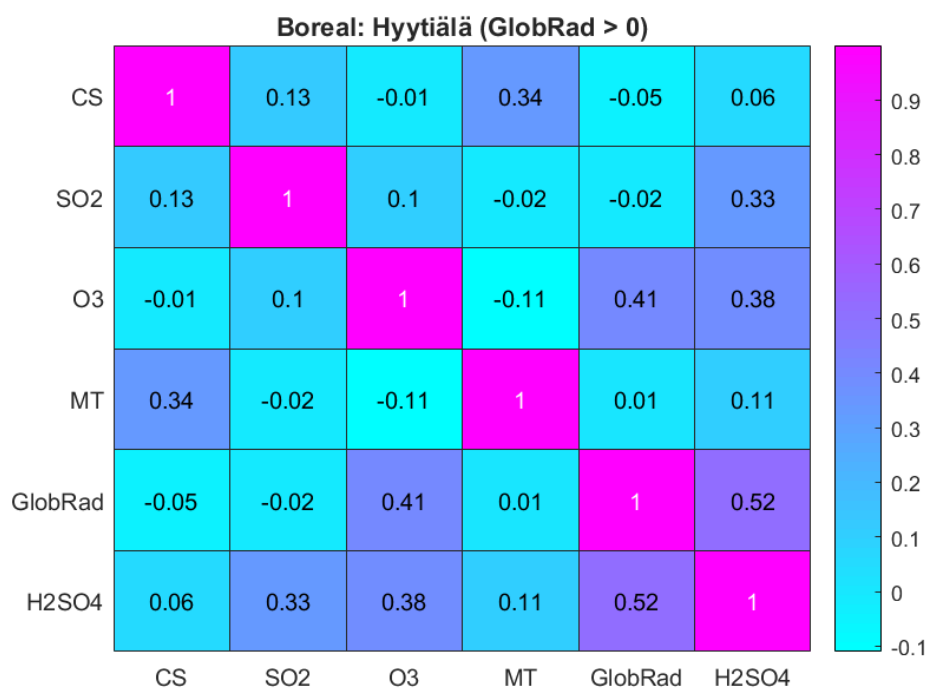

17  
18  
19  
20  
21  
22

Figure S 3 Pearson's correlation coefficients matrix between variables involved in  $H_2SO_4$  formation and loss at the Hyytiälä station (Global Radiation >  $0 W/m^2$ ). CS represents condensation sink in  $s^{-1}$ .  $SO_2$ ,  $O_3$  and MT (monoterpenes) in molecules/ $cm^3$ . GlobRad is global radiation in  $W/m^2$ .  $H_2SO_4$  is measured sulphuric acid in molecules/ $cm^3$ .

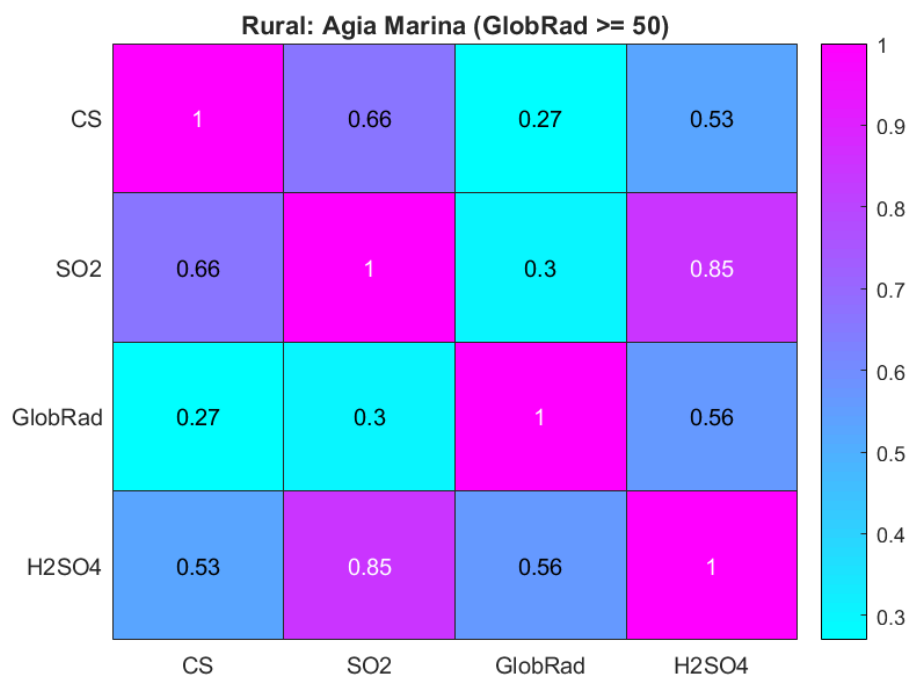

23  
24  
25  
26  
27

Figure S 4 Pearson's correlation coefficients matrix of variables involved in  $H_2SO_4$  formation and loss at the Agia Marina station (Global Radiation >  $50 W/m^2$ ). CS represents condensation sink in  $s^{-1}$ .  $SO_2$  is in molecules/ $cm^3$ . GlobRad is global radiation in  $W/m^2$ .  $H_2SO_4$  is measured sulphuric acid in molecules/ $cm^3$ .

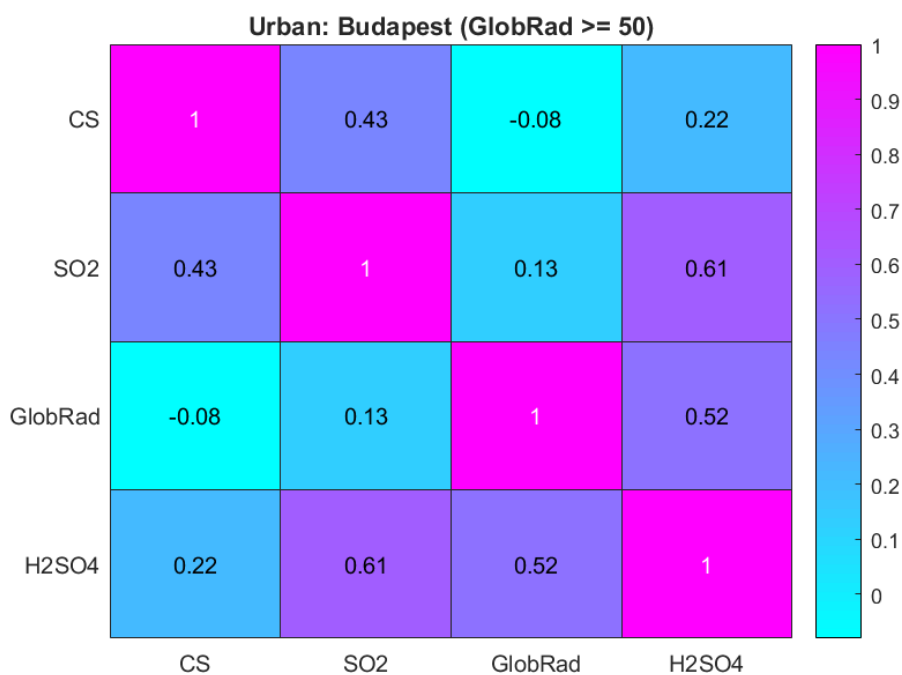

28  
29  
30  
31  
32  
33

Figure S 5 Pearson's correlation coefficients matrix of variables involved in  $H_2SO_4$  formation and loss at the Budapest station (Global Radiation  $> 50 W/m^2$ ). CS represents condensation sink in  $s^{-1}$ .  $SO_2$  in molecules/ $cm^{-3}$ . GlobRad is global radiation in  $W/m^2$ .  $H_2SO_4$  is measured sulphuric acid in molecules/ $cm^{-3}$ .

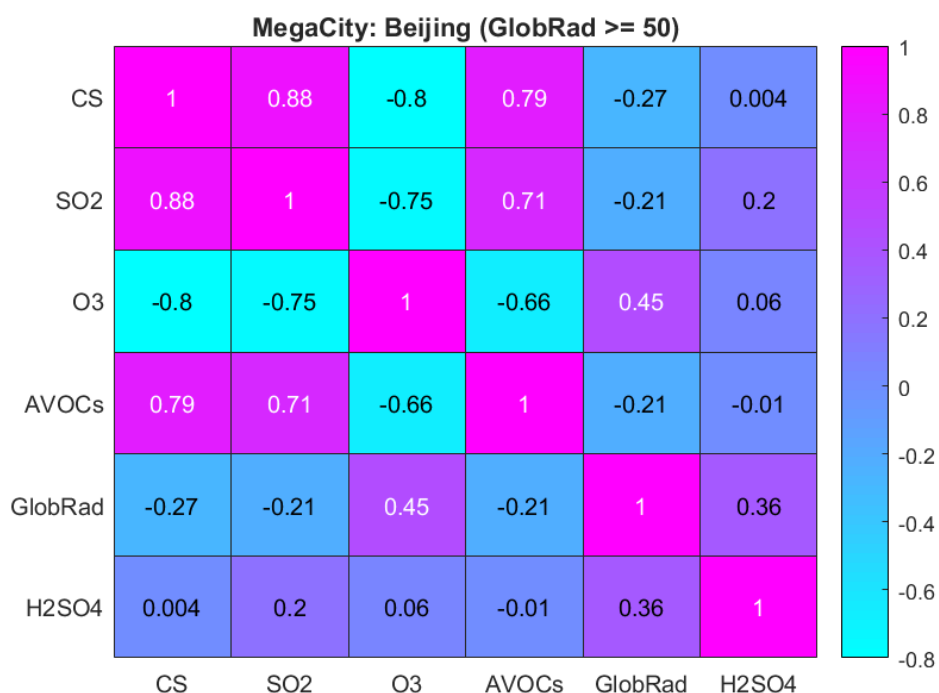

34  
35  
36  
37  
38  
39

Figure S 6 Pearson's correlation coefficients matrix between variables involved in  $H_2SO_4$  formation and loss at the Beijing station during daytime (Global Radiation  $> 50 W/m^2$ ). CS represents condensation sink in  $s^{-1}$ .  $SO_2$ ,  $O_3$  and AVOCs (Anthropogenic volatile organic compounds) in molecules/ $cm^{-3}$ . GlobRad is global radiation in  $W/m^2$ .  $H_2SO_4$  is measured sulphuric acid in molecules/ $cm^{-3}$ .

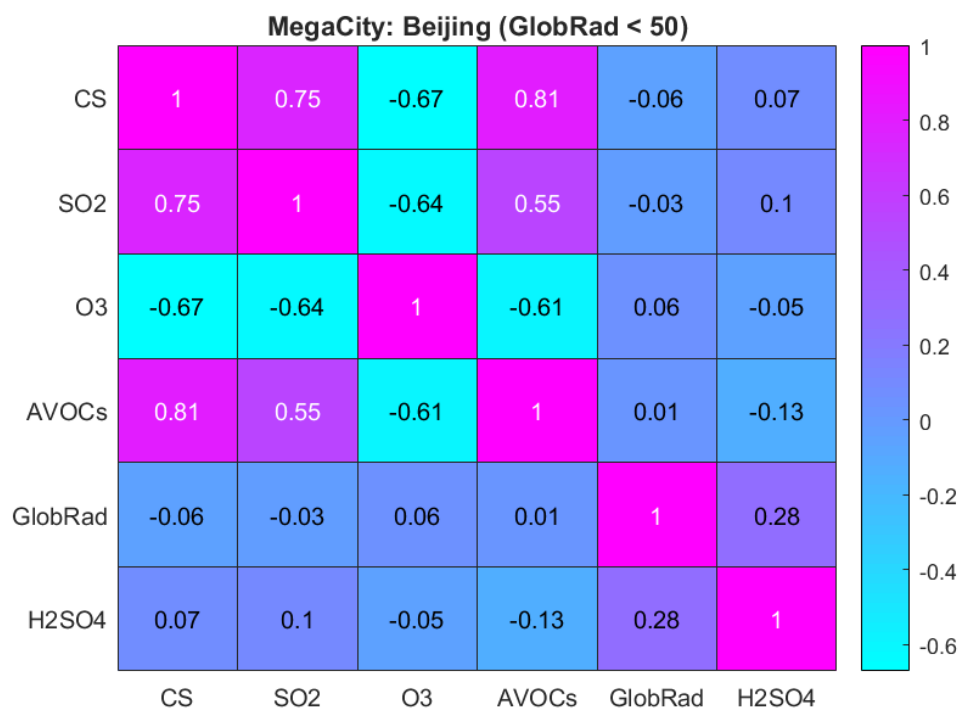

40

41 *Figure S 7 Pearson's correlation coefficients matrix between variables involved in H<sub>2</sub>SO<sub>4</sub> formation*  
 42 *and loss at the Beijing station during nighttime (Global Radiation < 50 W/m<sup>2</sup>). CS represents*  
 43 *condensation sink in s<sup>-1</sup>. SO<sub>2</sub>, O<sub>3</sub> and AVOCs (Anthropogenic volatile organic compounds) in*  
 44 *molecules/cm<sup>-3</sup>. GlobRad is global radiation in W/m<sup>2</sup>. H<sub>2</sub>SO<sub>4</sub> is measured sulphuric acid in*  
 45 *molecules/cm<sup>-3</sup>.*

46

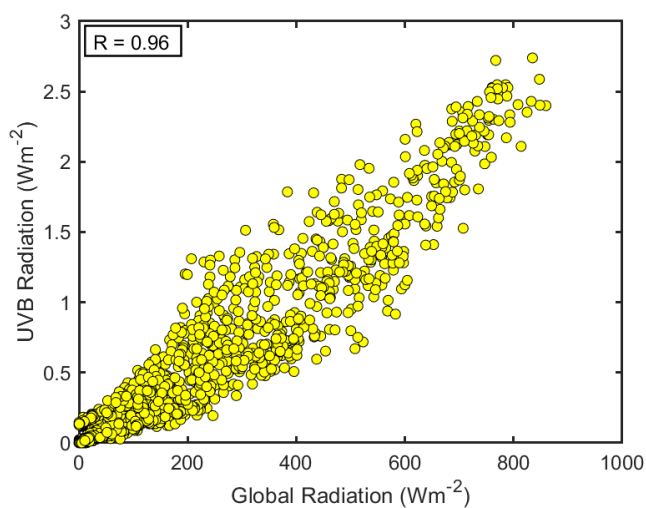

47

48 *Figure S 8 Comparison between Global radiation and UVB in Hyytiälä. Hourly medians are shown.*  
 49 *The total number of data points in the plot is 2306.*

50

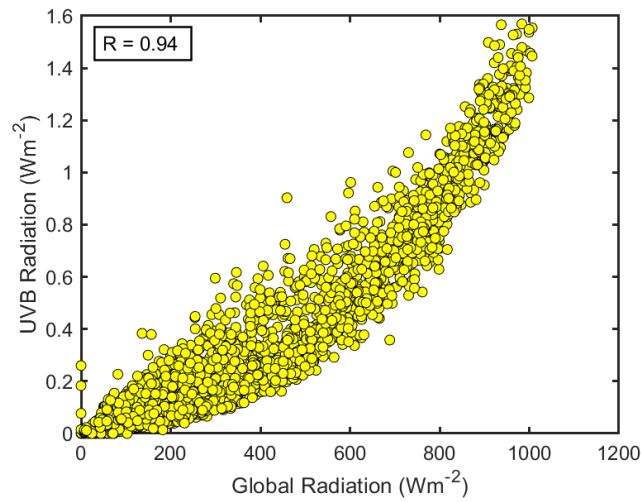

51

52 *Figure S 9 Comparison between Global radiation and UVB in Beijing. Hourly medians are shown.*

53 *The total number of data points in the plot is 7106.*

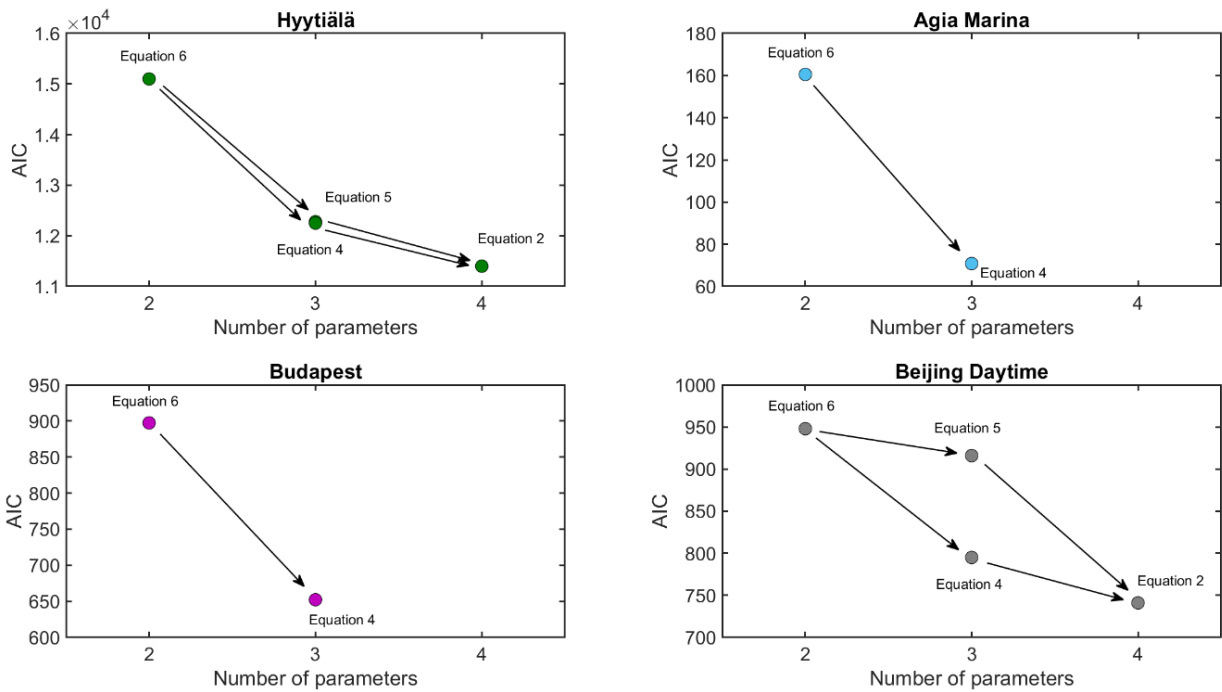

54

55 *Figure S 10 Evaluation of the goodness of the fit using the Akaike information criterion (AIC)*

56 *(McElreath, 2018). Number of parameters refers to the number of variables in each equation used.*

57 *For example, Equation 2 uses four parameters which are the two sources (Radiation and sCI) and*

58 *the two sinks (CS and cluster formation).*

59

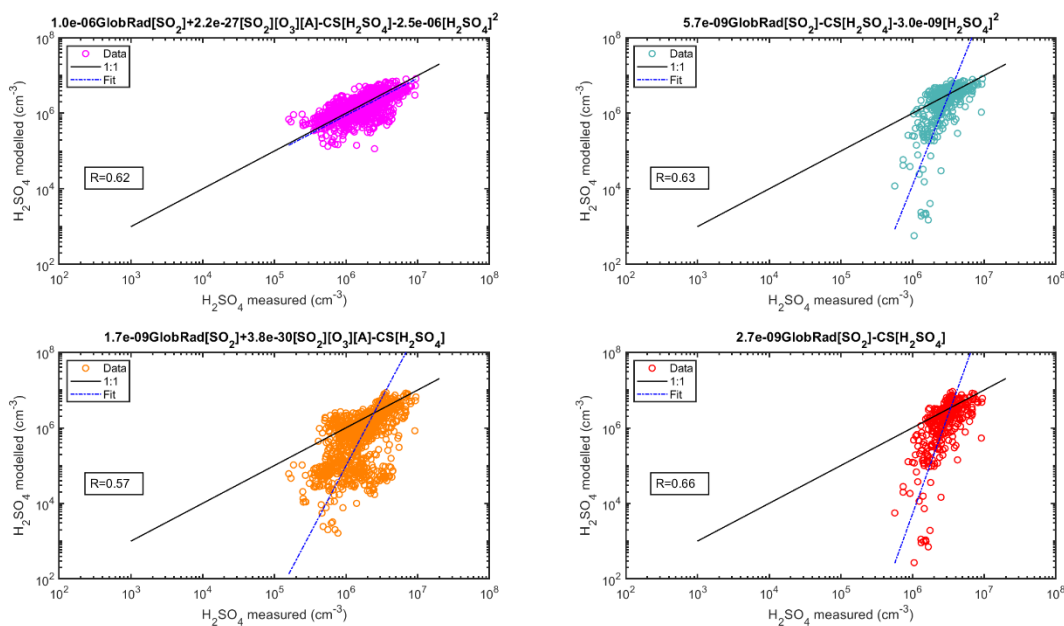

60  
 61 *Figure S 11 Sulphuric acid proxy concentration as a function of measured sulphuric acid. observation*  
 62 *at BUCT station, Beijing, China for day and nighttime combined. The observed concentrations are*  
 63 *measured 2018-2019 using CI-API-ToF and are 1-hour medians resulting in a total of 902 data*  
 64 *points. In (A), the full Equation 2 is used, in (B) the equation without the Stabilized Criegee*  
 65 *Intermediates source (Equation 4), in (C) the equation without the cluster sink term (Equation 5) and*  
 66 *in (D) the equation without both the Criegee Intermediates source and the cluster sink term (Equation*  
 67 *6).*

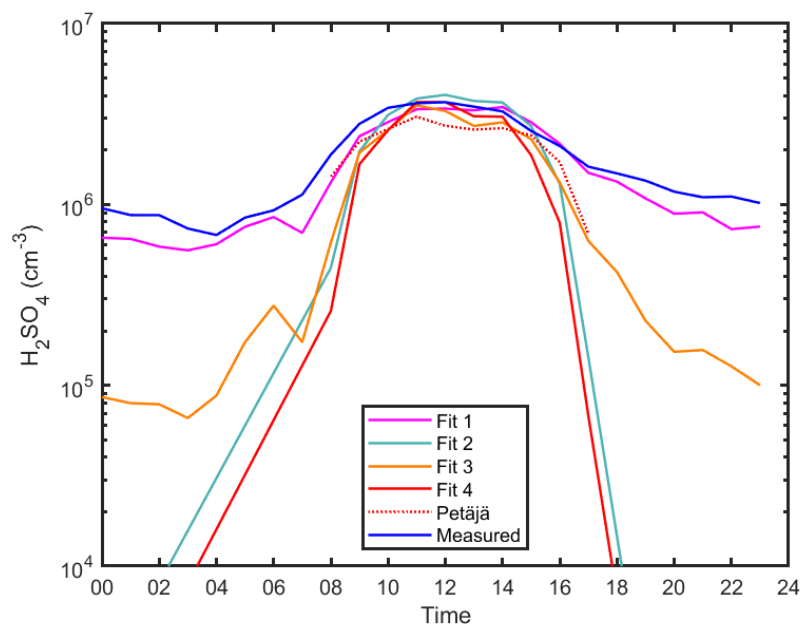

68  
 69 *Figure S 12 The diurnal variation of sulphuric acid proxy concentrations using different fits and*  
 70 *observed concentrations at Beijing China. Median values are shown. Fits 1,2, 3 and 4 corresponds*  
 71 *to the Equations 2, 4, 5, and 6, respectively. Petäjä fit shown is applied using the coefficients reported*  
 72 *in Petäjä et al. 2009.*  
 73

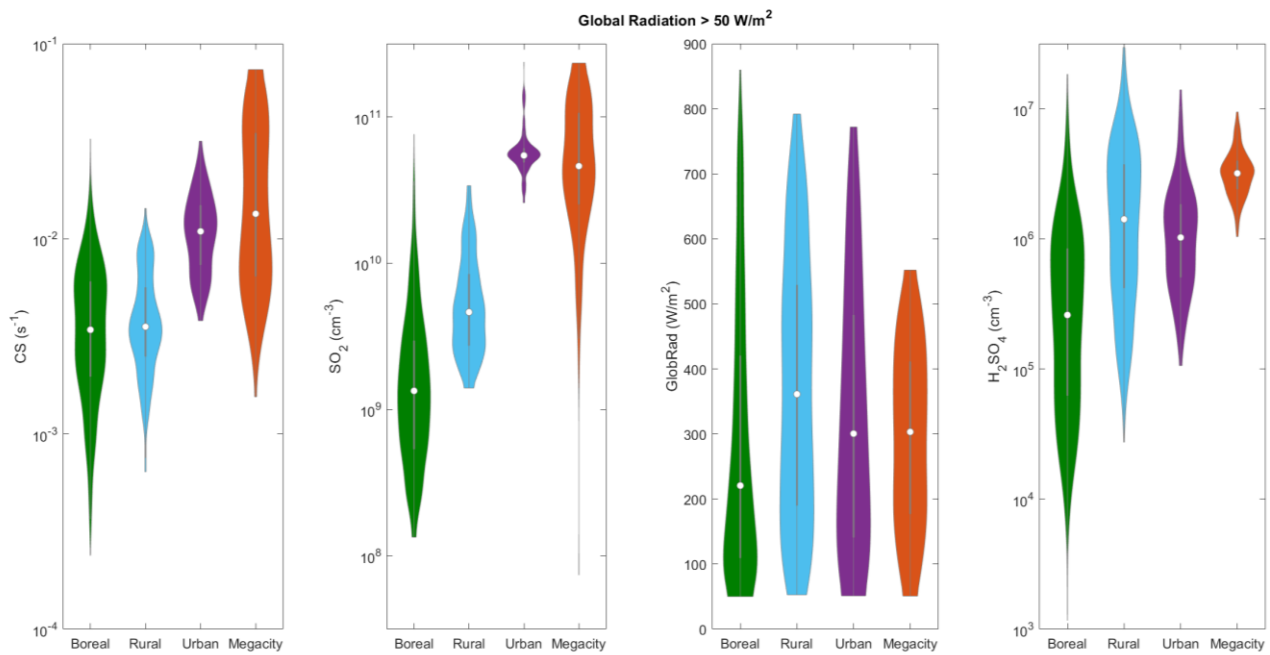

74  
 75 *Figure S 13 Daytime data (GlobRad > 50 W/m<sup>2</sup>) condensation sink, SO<sub>2</sub>, GlobRad and H<sub>2</sub>SO<sub>4</sub>*  
 76 *concentrations in different environments. The concentrations are displayed as violin plots which*  
 77 *are a combination of boxplot and a kernel distribution function on each side of the boxplots. The*  
 78 *white circles define the median of the distribution and the edges on the inner grey boxes refer to the*  
 79 *25<sup>th</sup> and 75<sup>th</sup> percentiles respectively.*

80

81
